# Supplementary material
Source: PubMed Central journal article supplement (PMC3983393)
Supplement: jf405580c_si_001.pdf [file jf405580c_si_001.pdf]

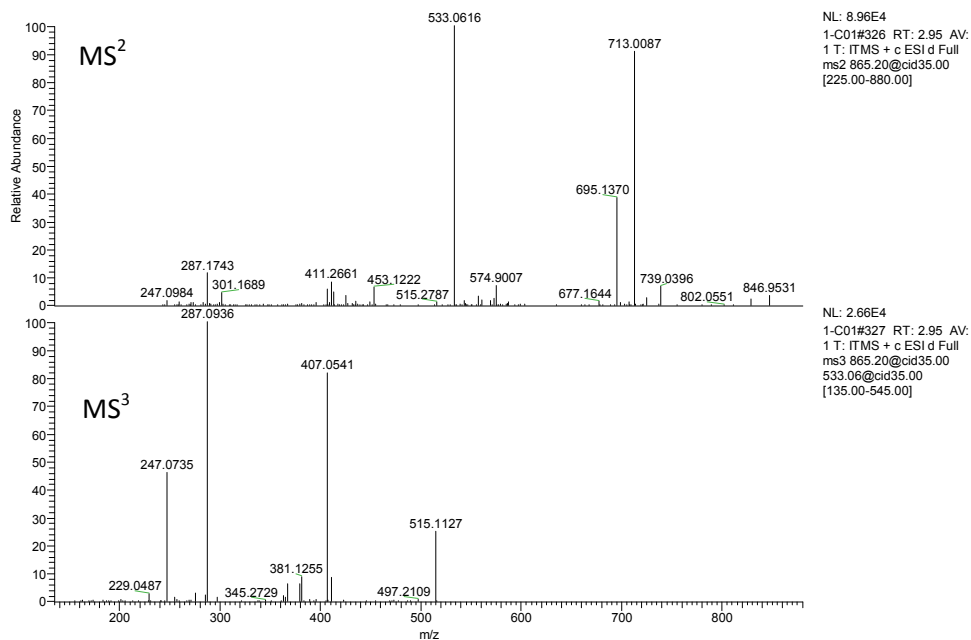

Figure S1 The MS<sup>2</sup> and MS<sup>3</sup> spectra of ion at  $m/z$  865

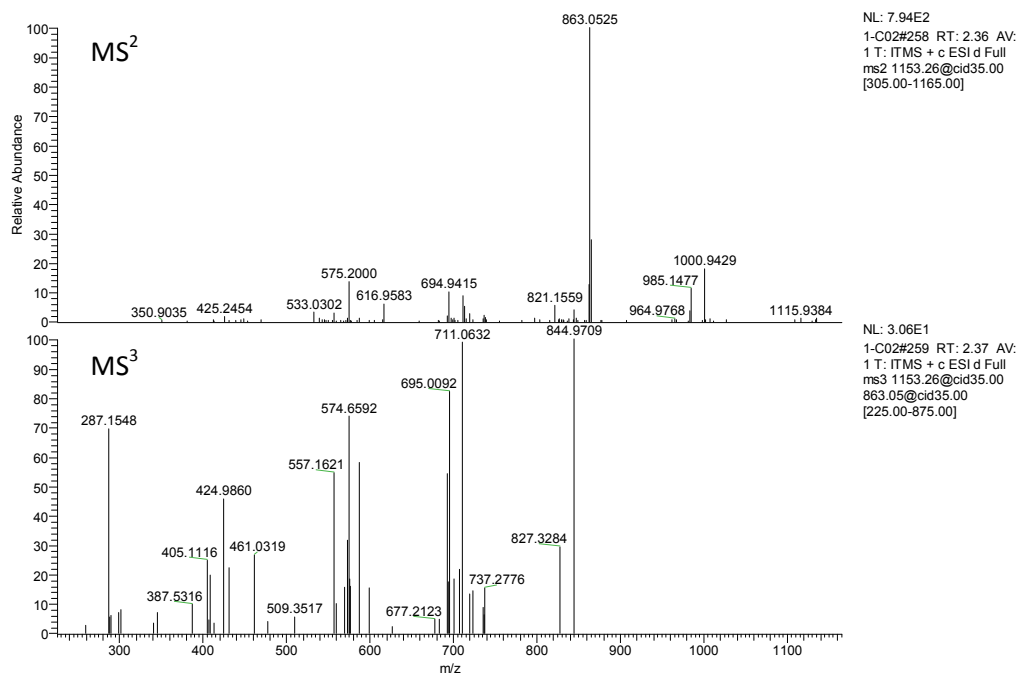

Figure S2 The MS<sup>2</sup> and MS<sup>3</sup> spectra of ion at  $m/z$  1153

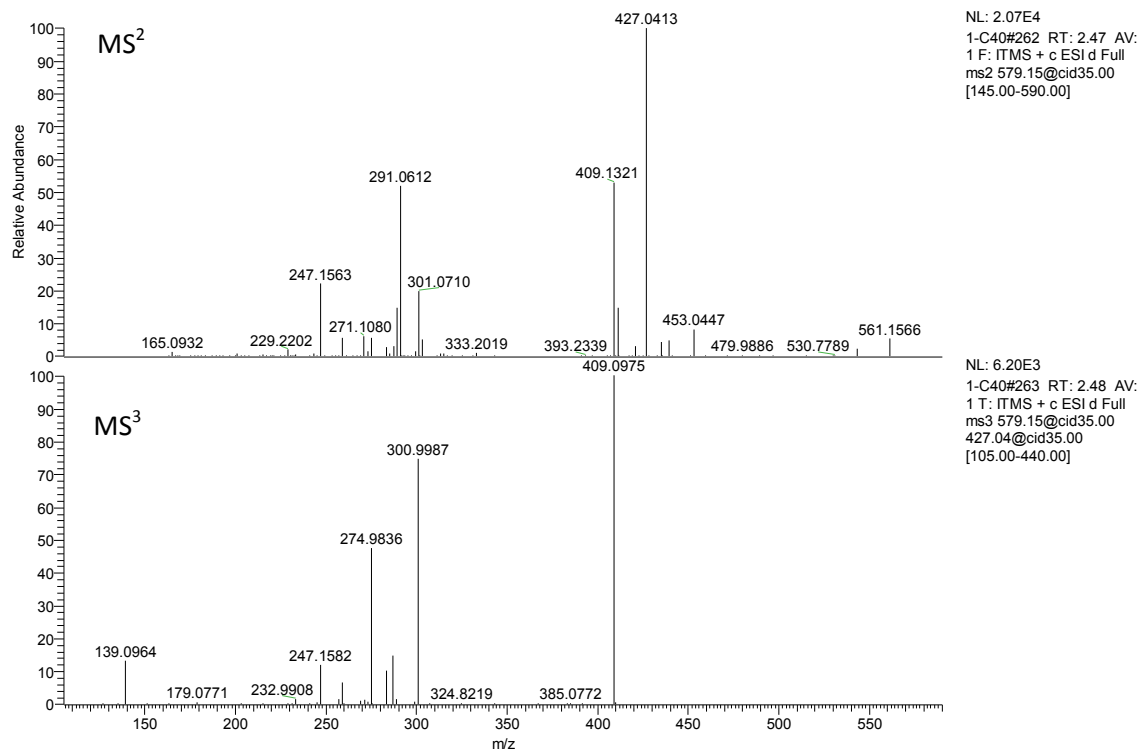

Figure S3 The MS<sup>2</sup> and MS<sup>3</sup> spectra of ion at  $m/z$  579

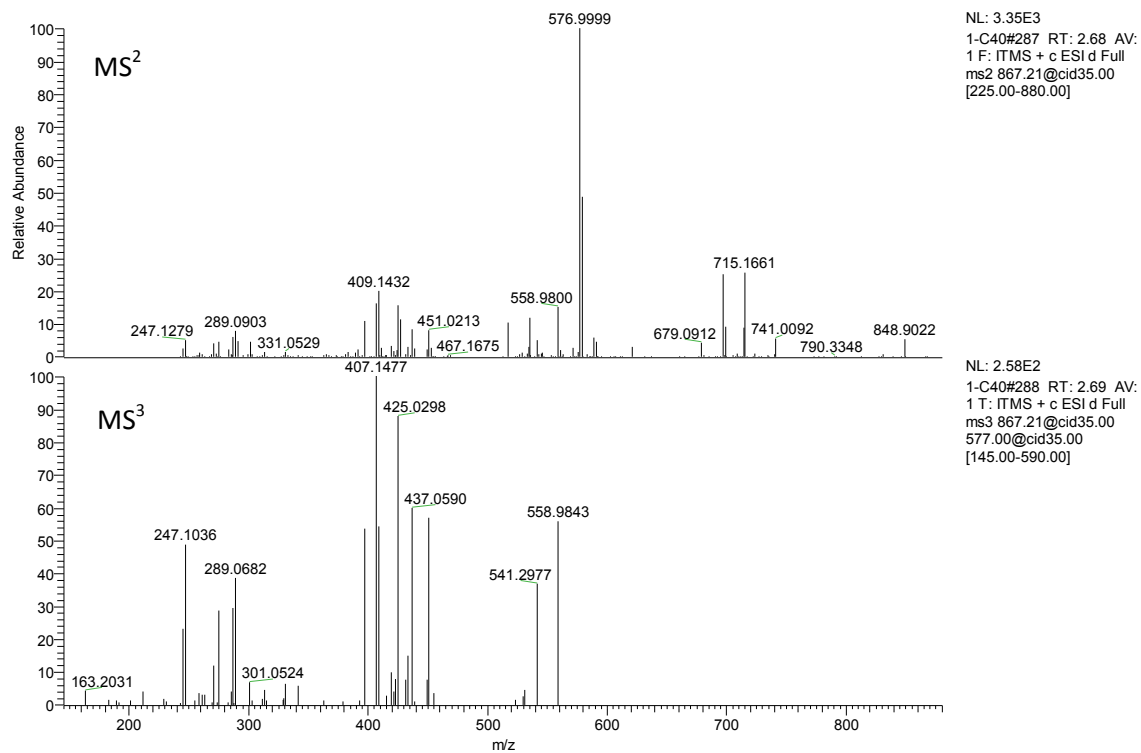

Figure S4 The MS<sup>2</sup> and MS<sup>3</sup> spectra of ion at  $m/z$  867

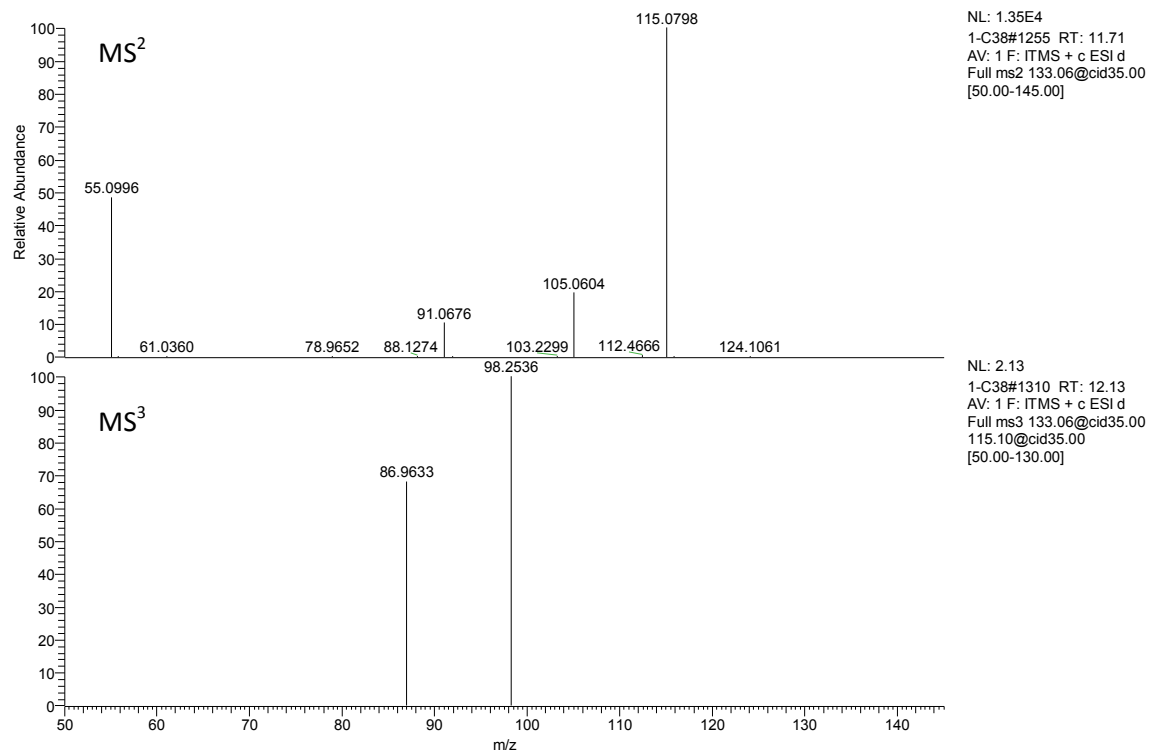

Figure S5 The MS<sup>2</sup> and MS<sup>3</sup> spectra of ion at  $m/z$  133

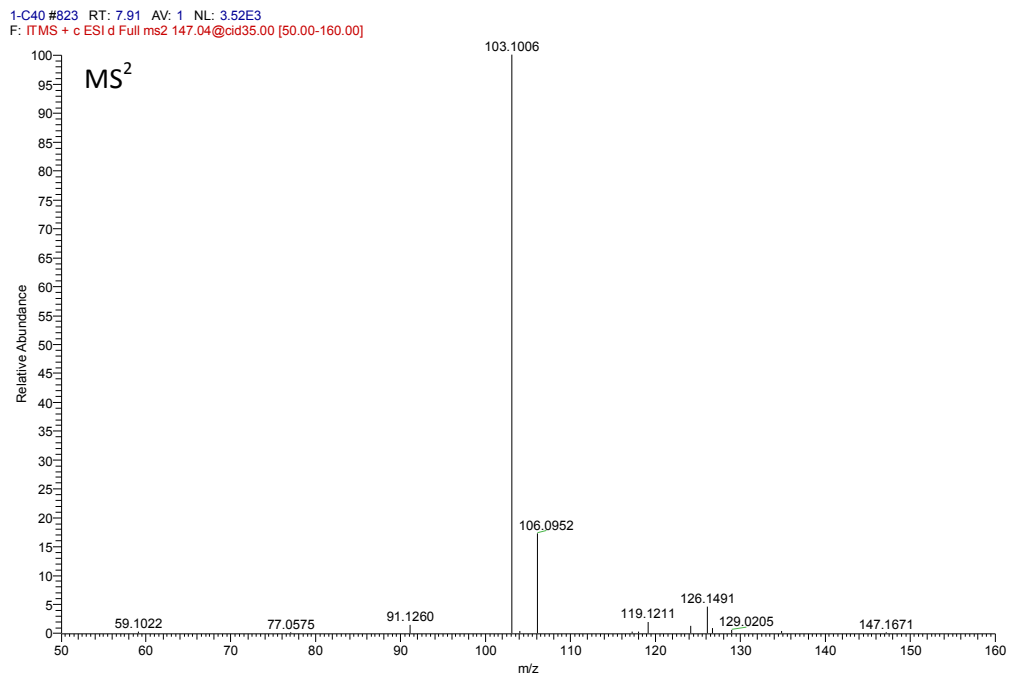

Figure S6 The MS<sup>2</sup> spectra of ion at  $m/z$  147

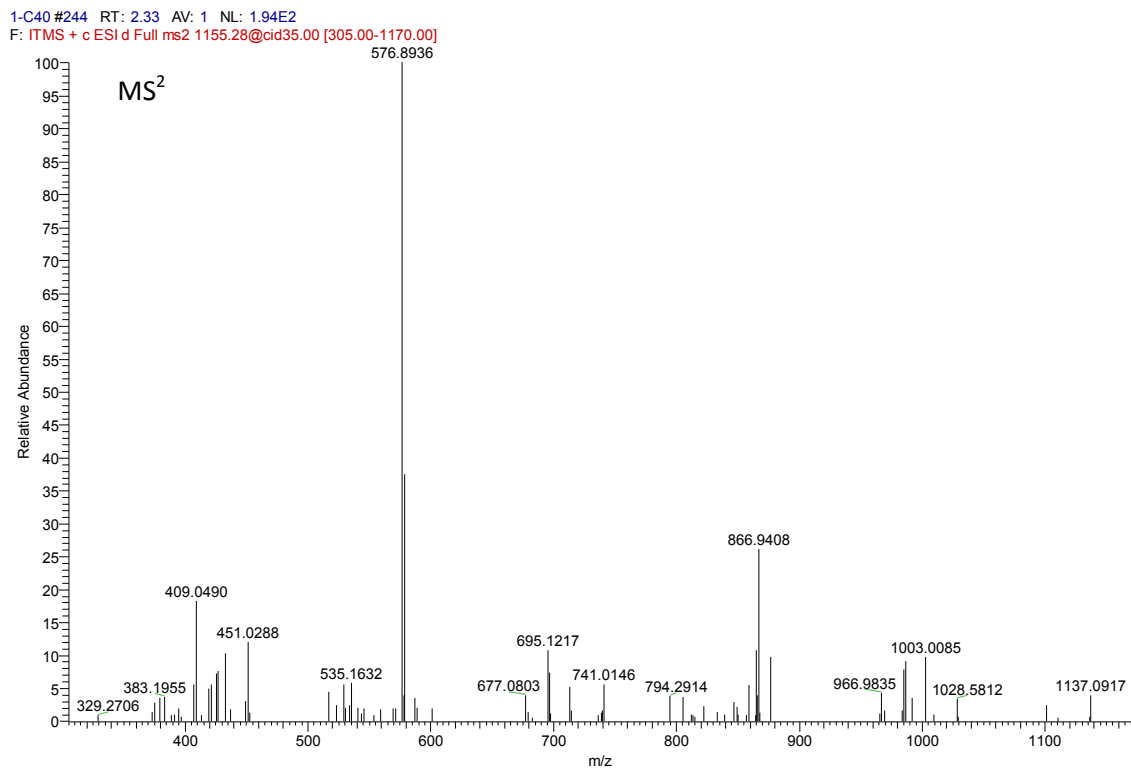

Figure S7 The MS<sup>2</sup> spectra of ion at  $m/z$  1155

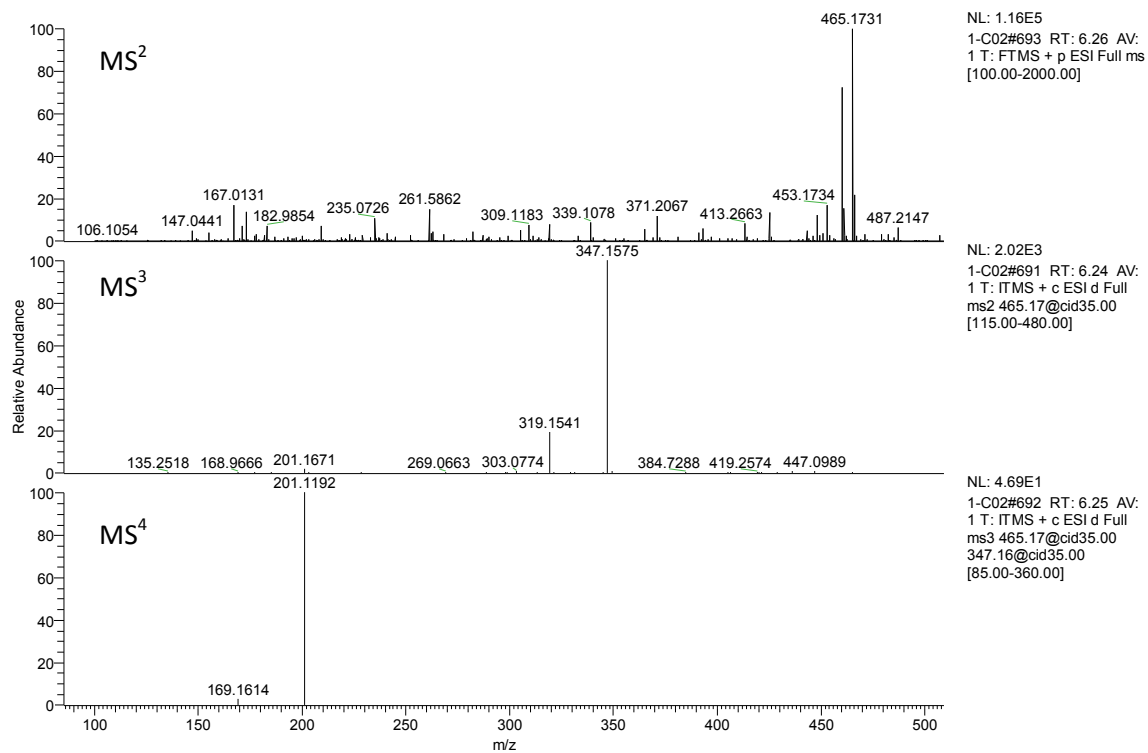

Figure S8 The MS<sup>2</sup> to MS<sup>4</sup> spectra of ion at  $m/z$  465

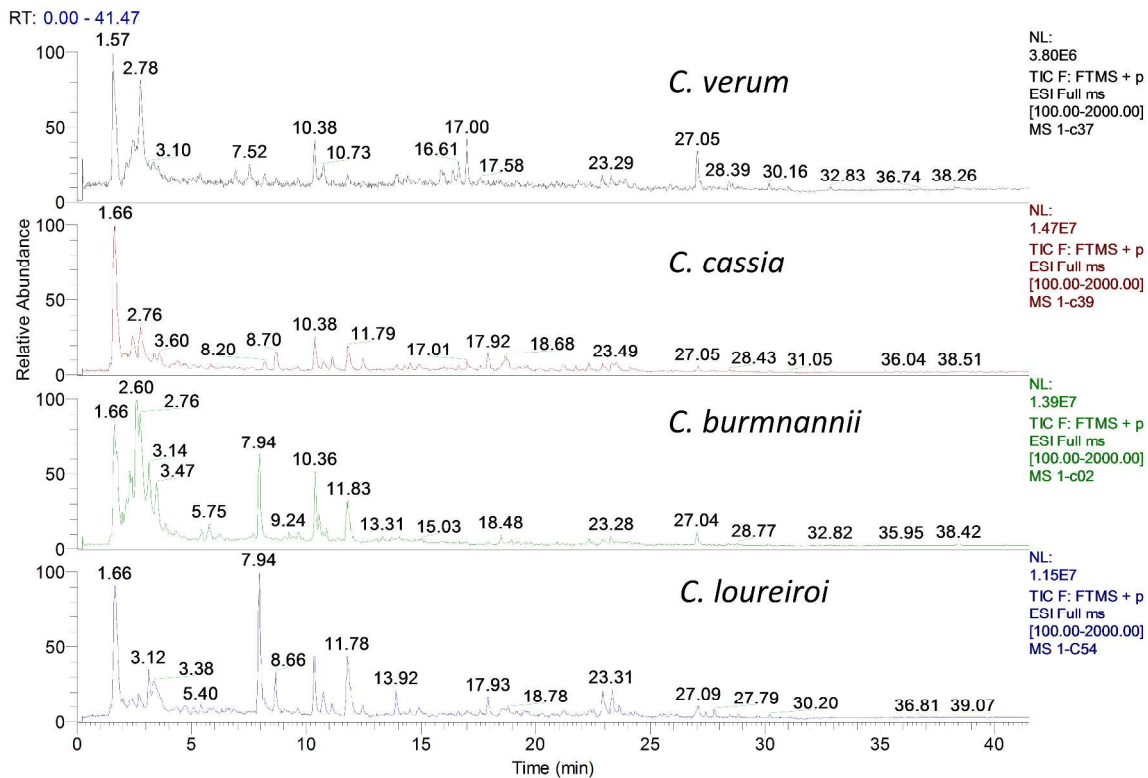

Figure S9. UHPLC-HRMS Chromatograms of the four cinnamon species studied
